# Supplementary material for: Fluorometric Detection of SARS-CoV-2 Single-Nucleotide Variant L452R Using Ligation-Based Isothermal Gene Amplification
Source: MDPI journal article supplement (doi:10.3390/bioengineering10101116), 2023-09-23
Supplement: s1 [file s1]

**Table S1.** Oligonucleotides sequences (5' to 3') used in the assay.

|                                                                                   | Name                     | Sequence (5' → 3')                                                                                                                                                    | Size (nt) |
|-----------------------------------------------------------------------------------|--------------------------|-----------------------------------------------------------------------------------------------------------------------------------------------------------------------|-----------|
|  | Hairpin probe (L452R)*   | p- <b>GGT AAT TAT AAT TAC CAC CAA CCT TAG</b><br><b>ATG ACC CTC CGT</b> TTT TTT TTT TTT <b>TTC</b><br><b>GGA GGG TC</b>                                               | 62        |
|  | Linear probe (L452R)**   | <b>GAC CCT CCC CCC CAC TCC CTC AGC AGA</b><br><b>CTT CCT AAA CAA TCT ATA C</b>                                                                                        | 47        |
|  | Dumbbell padlock***      | p-GCA CGC CTA CTA <b>CCC TAA CCC TAA CCC</b><br><b>TAA CCC</b> TGC GTG CCG TAA CCC TAC TAC<br>ACC ACC ACC AC <b>G ACC CTC CCC CCC ACT</b><br><b>CCC TCA</b> GGT TAC G | 94        |
|  | model SDAP               | <b>TGA GG G AGT GGG GGG GAG GGT C</b>                                                                                                                                 | 22        |
|                                                                                   | Wild-type /L452R RNA**** | UCU AAG GUU GGU GGU AAU UAU AAU UAC<br><b>CU/GG</b> UAU AGA UUG UUU AGG AAG UCU AA                                                                                    | 53        |

\*Hairpin probe: annealing site to both wild type and mutant RNA (black-colored and bold-faced sequences); hairpin probe loop (blue-colored sequences); hairpin probe stem (blue-colored underlined sequences): p, phosphorylation at the 5'-end.

\*\* Linear probe: annealing sites to both wild type and mutant RNA (black-colored and bold-faced sequences), mutant RNA (pink-colored sequences) and single nucleotide variants of L452R (red-colored and yellow-highlighted sequence)

\*\*\* Dumbbell padlock: annealing site to the RCA primers generated by SDA (purple-colored and bold-faced sequences); C-rich sequences to generate the G-quadruplex (light green-colored and bold-faced sequences); p, phosphorylation at the 5'-end.

\*\*\*\* Wild type/L452R model RNA: wild type and mutant type sequence, respectively (Underlined and bold-faced).
